# Supplementary material for: Barnase encapsulation into submicron porous CaCO3 particles: studies of loading and enzyme activity
Source: Royal Society of Chemistry journal article supplement (doi:10.1039/d1tb01315g), 2021-01-01
Supplement: d1tb01315g1.pdf [file d1tb01315g1.pdf]

## Supporting Information

### **Barnase encapsulation into submicron porous CaCO<sub>3</sub> particles – studies of loading and enzyme activity**

Alexey M. Yashchenok<sup>a\*</sup>, Olga I. Gusliakova<sup>b</sup>, Elena V. Kononova<sup>c</sup>, Marina V. Novoselova<sup>a</sup>, Victoria O. Shipunova<sup>c</sup>, Tatiana O. Abakumova<sup>d</sup>, Olga Efimova<sup>e</sup>, Roman Kholodenko<sup>c</sup>, Alexey A. Schulga<sup>c</sup>, Timofei S. Zatsepin<sup>d</sup>, Dmitry A. Gorin<sup>a</sup>, Sergey M. Deyev<sup>c</sup>

<sup>a</sup> Center for Photonics and Quantum Materials, Skolkovo Institute of Science and Technology, 121205 Moscow, Russia. Email: a.yashchenok@skoltech.ru

<sup>b</sup> Department of Nano- and Biomedical Technologies, Saratov State University, 410012 Saratov, Russia.

<sup>c</sup> Shemyakin-Ovchinnikov Institute of Bioorganic Chemistry, Russian Academy of Sciences, Miklukho-Maklaya Street 16/10, 117997 Moscow, Russia.

<sup>d</sup> Center for Life Science, Skolkovo Institute of Science and Technology, 121205 Moscow, Russia.

<sup>e</sup> Center for for Neurobiology and Brain Restoration, Skolkovo Institute of Science and Technology, 121205 Moscow, Russia

\* Corresponding authors

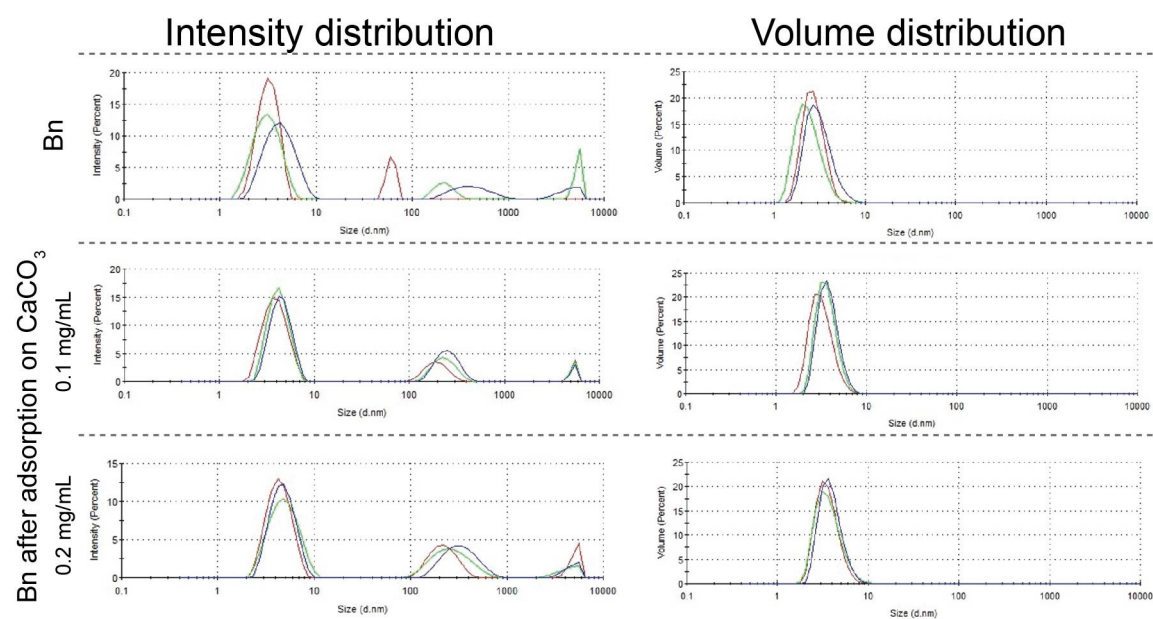

Figure S1. Size distribution by intensity (left) and by volume (right) of Bn in water solution with working pH 8 and after incubation with  $\text{CaCO}_3$  for 1 h.

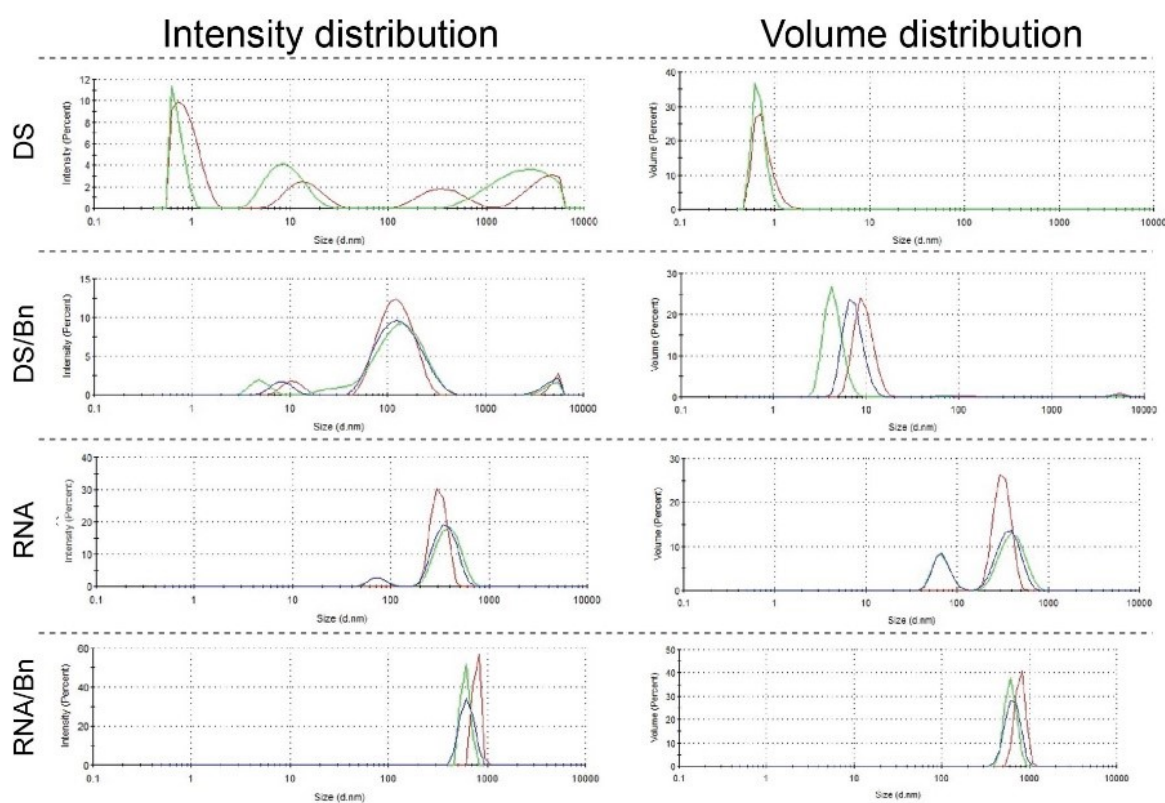

Figure S2. Size distribution by intensity (left) and by volume (right) of DS, RNA, DS/Bn and RNA/Bn in water solution with working pH 8.

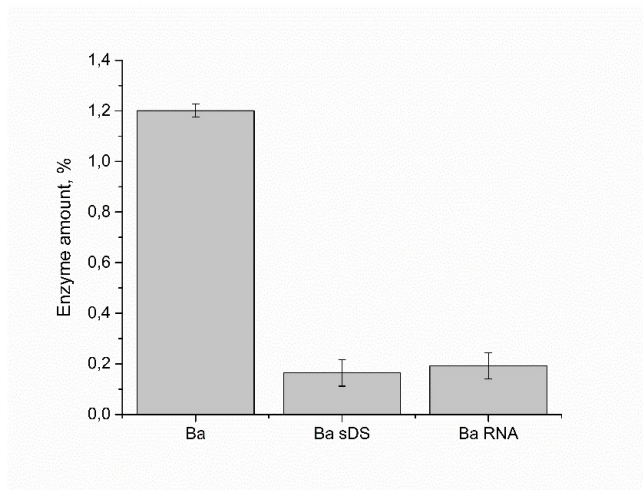

Figure S3. The amount of the enzyme in the supernatant after one washing step determined by Bredford method.

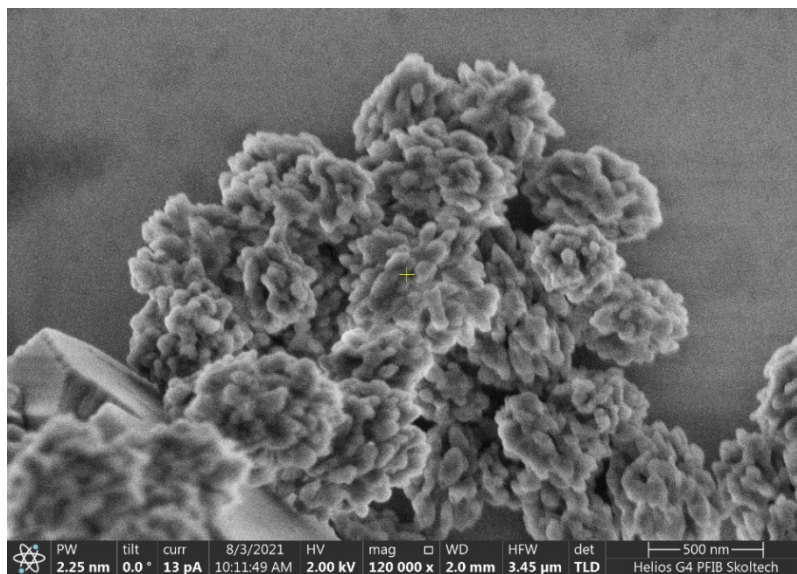

Figure S4. SEM image of pristine CaCO<sub>3</sub> particles.

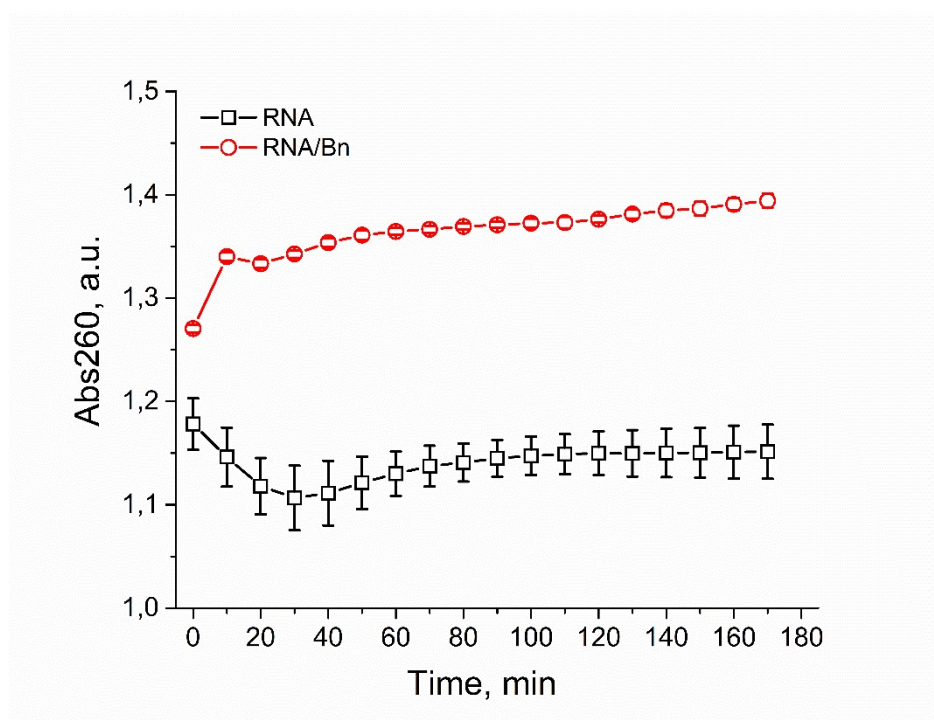

Figure S5. Absorbance at 260 nm of RNA and RNA incubated with Bn for 3 h at room temperature.

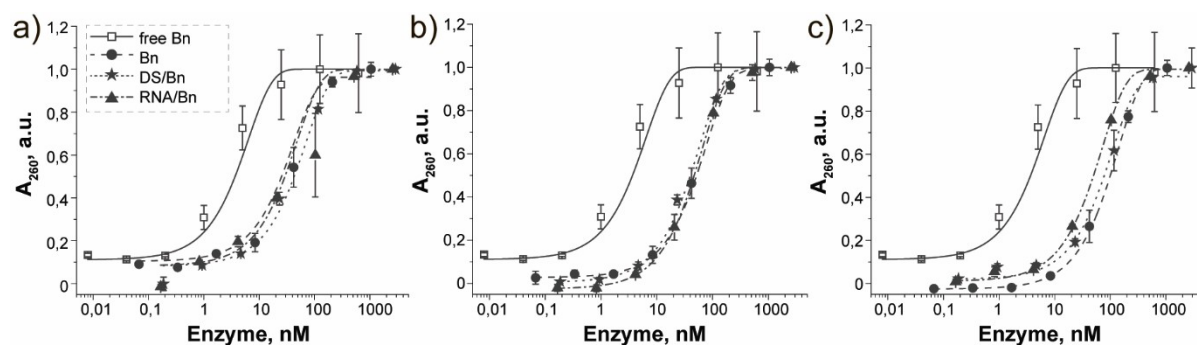

Figure S6. RNase activities of Bn in  $\text{CaCO}_3$  particles encapsulated with and without DS or RNA by adsorption method determined at different time intervals, namely 24, 192, and 312 hours. The total enzyme concentration in  $\text{CaCO}_3$  particles was determined based on the loading efficiency for each type of particles with respect to initial enzyme concentrations.

CaCO<sub>3</sub>-Bn

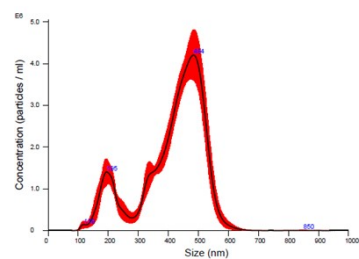

CaCO<sub>3</sub>-DS-Bn

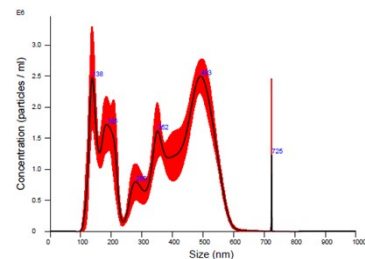

CaCO<sub>3</sub>-RNA-Bn

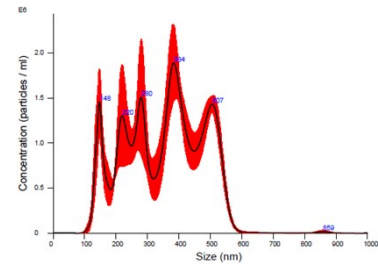

Figure S7. Averaged particle concentrations and size for different formulation of Bn.
